# Supplementary material for: Investigation of the long-term variations in hydro-climatology of the Dinder and Rahad basins and its implications on ecosystems of the Dinder National Park, Sudan
Source: Copernicus journal article supplement (doi:10.5194/hess-2016-407), 2016-09-19
Supplement: Supplementary file [file hess-2016-407-AC1-supplement.pdf]

Table 1: The different ecosystem services provided by the DNP.

| <b>Provisioning services</b>                                                                                                                                                                                                                                          | <b>Regulating services</b>                                                                                                                                                                                                                                                                                                        | <b>Supporting services</b>                                                                                                                                                                                                                                                                              | <b>Cultural services</b>                                                                                                                                                                                                                                                                |
|-----------------------------------------------------------------------------------------------------------------------------------------------------------------------------------------------------------------------------------------------------------------------|-----------------------------------------------------------------------------------------------------------------------------------------------------------------------------------------------------------------------------------------------------------------------------------------------------------------------------------|---------------------------------------------------------------------------------------------------------------------------------------------------------------------------------------------------------------------------------------------------------------------------------------------------------|-----------------------------------------------------------------------------------------------------------------------------------------------------------------------------------------------------------------------------------------------------------------------------------------|
| <p><b>Food:</b><br/>Mayas Ecosystem provides the conditions for growing food for both human and wild animals. Mayas provide fish for human consumption and grass for wild animals. Forests also provide food for human consumption such as honey.</p>                 | <p><b>Local climate and air quality:</b><br/>Trees provide shade for wild animals whilst forests influence precipitation both locally and regionally. Trees or other plants also play an essential role in regulating air quality by removing pollutants from the atmosphere.</p>                                                 | <p><b>Habitats for species:</b><br/>The DNP ecosystems provide different habitats for many individual plant or animal that are essential for a species' lifecycle to survive. Migratory species including mammals, birds and fish are all depend upon different ecosystems during their migrations.</p> | <p><b>Tourism:</b><br/>High potential opportunity for tourism and education (e.g. attractive place for local people and foreigner and opportunity for research and training). Thus, it provides considerable economic benefits and is a potential source of income for the country.</p> |
| <p><b>Fresh water:</b><br/>Mayas ecosystems play a vital role in the local hydrological cycle, as they regulate the flow and purification of water. Vegetation and forests influence the quantity of water available locally and further downstream.</p>              | <p><b>Carbon sequestration and storage:</b><br/>Ecosystems regulate the global climate by storing and sequestering greenhouse gases. In this way forest ecosystems in the DNP are carbon stores. Biodiversity also plays an important role by improving the capacity of ecosystems to adapt to the effects of climate change.</p> | <p><b>Nutrient cycling:</b><br/>Mayas ecosystems regulate the flows and concentrations of nutrients through a number of complex processes that allow these elements to be extracted from their mineral sources or recycled from dead organisms.</p>                                                     | <p><b>Aesthetic appreciation and inspiration for culture and art:</b><br/>The NDP Biodiversity, ecosystems and natural landscapes have been the source of inspiration for much of the art, folklore and culture in Sudan.</p>                                                           |
| <p><b>Raw materials and Medicinal resources:</b><br/>The DNP ecosystems provide a great diversity of materials for construction and fuel including wood and charcoal. The DNP ecosystems also provide many plants used as traditional medicines for local people.</p> | <p><b>Moderation of extreme events:</b><br/>The DNP plays an important roles in modulating the effects of extreme events. For example prevent or reduce flooding. Mayas wetlands attenuate floods by absorbing runoff peaks and storm surges.</p>                                                                                 | <p><b>Maintenance of genetic diversity:</b><br/>Some habitats have an exceptionally high number of species which makes them more genetically diverse than others.</p>                                                                                                                                   |                                                                                                                                                                                                                                                                                         |

Table 3: Man-Kendall results of annual rainfall at the 12 examined precipitation stations.

| Station     | Kendall's tau | S    | P-value       | Trend                    |
|-------------|---------------|------|---------------|--------------------------|
| Bahir Dar   | -0.09898      | -107 | 0.3320        | No significant change    |
| Gonder      | -0.1176       | -156 | 0.02217       | No significant change    |
| Samsam      | -0.1979       | -111 | 0.1023        | No significant change    |
| Umsienat    | 0.1658        | 93   | 0.1728        | No significant change    |
| Doka        | 0.3333        | 187  | <b>0.0051</b> | Significantly increasing |
| Hawata      | 0.2141        | 120  | 0.0777        | No significant change    |
| Gedarif     | -0.1260       | -755 | 0.0515        | No significant change    |
| Gadambalyia | 0.0607        | 34   | 0.6247        | No significant change    |
| Damazin     | 0.3158        | 60   | 0.0537        | No significant change    |
| Abu Naama   | 0.2762        | 29   | 0.1659        | No significant change    |
| Um Benien   | 0.2952        | 31   | 0.1370        | No significant change    |
| Sennar      | -0.0533       | -228 | 0.4513        | No significant change    |

Table 6: Medians and significant counts for IHA parameters for both Dinder and Rahad. Numbers in bold designate values that are statistically significant at 5% significant level.

| IHA PARAMETERS      | Dinder  |       |                               | Rahad   |        |                               |
|---------------------|---------|-------|-------------------------------|---------|--------|-------------------------------|
|                     | MEDIANS |       | SIGNIFICANCE COUNT<br>Medians | MEDIANS |        | SIGNIFICANCE COUNT<br>Medians |
|                     | Pre     | Post  |                               | Pre     | Post   |                               |
| Parameter Group #1  |         |       |                               |         |        |                               |
| January             | 0       | 0     |                               | 0       | 0      |                               |
| February            | 0       | 0     |                               | 0       | 0      |                               |
| March               | 0       | 0     |                               | 0       | 0      |                               |
| April               | 0       | 0     |                               | 0       | 0      |                               |
| May                 | 0       | 0     |                               | 0       | 0      |                               |
| June                | 0       | 0     |                               | 0       | 0      |                               |
| July                | 43.4    | 49.82 | 0.6997                        | 44.95   | 65.42  | <b>0.006006</b>               |
| August              | 266.3   | 210.4 | 0.5025                        | 133.7   | 152.7  | <b>0.003003</b>               |
| September           | 292.1   | 297.6 | 0.8448                        | 143.2   | 165.7  | <b>0.02503</b>                |
| October             | 101.2   | 89.91 | 0.4334                        | 49.08   | 67.15  | 0.08308                       |
| November            | 0       | 14.19 |                               | 0       | 14     |                               |
| December            | 0       | 0     |                               | 0       | 0      |                               |
| Parameter Group #2  |         |       |                               |         |        |                               |
| 1-day maximum       | 546.8   | 468.7 | <b>0.04304</b>                | 166.6   | 175.8  | 0.2262                        |
| 3-day maximum       | 513.4   | 444.4 | 0.08308                       | 164.4   | 175.5  | 0.1241                        |
| 7-day maximum       | 465.6   | 394.4 | 0.09209                       | 159.1   | 173.1  | <b>0.04104</b>                |
| 30-day maximum      | 372     | 321.3 | 0.1832                        | 143.9   | 166.9  | <b>0.01401</b>                |
| 90-day maximum      | 265.3   | 208.4 | 0.3213                        | 113.7   | 137.7  | <b>0.01201</b>                |
| Number of zero days | 250     | 233   | <b>0.01602</b>                | 244     | 215.5  | <b>0.002002</b>               |
| Base flow index     | 0       | 0     |                               | 0       | 0      |                               |
| Parameter Group #3  |         |       |                               |         |        |                               |
| Date of maximum     | 244     | 250   | 0.3003                        | 252     | 256    | 0.2893                        |
| Parameter Group #4  |         |       |                               |         |        |                               |
| High pulse count    | 1.5     | 3     | 0.08509                       | 2       | 2      | 0.4164                        |
| High pulse duration | 63.5    | 11.5  | 0.1562                        | 41      | 39.5   | 0.8679                        |
| Parameter Group #5  |         |       |                               |         |        |                               |
| Rise rate           | 31.45   | 19.78 | <b>0.009009</b>               | 4.56    | 2.67   | <b>0.04905</b>                |
| Fall rate           | -17.15  | -8.08 | <b>0.007007</b>               | -4.37   | -2.435 | <b>0.01101</b>                |
| Number of reversals | 39      | 43    | 0.06406                       | 33      | 31     | 0.5495                        |
